# Supplementary material for: Farmers’ Knowledge, Attitudes, and Perceptions Regarding Carcinogenic Pesticides in Fez Meknes Region (Morocco)
Source: Int J Environ Res Public Health. 2021 Oct 16;18(20):10879. doi: 10.3390/ijerph182010879 (PMC8535244; doi:10.3390/ijerph182010879)
Supplement: Supplementary file 1 [file ijerph-18-10879-s001.zip › ijerph-1398305-supplementary.pdf]

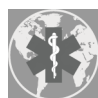

## Supplementary Materials

**Table S1.** Description of non-probability (empirical) sampling with the quota method.

| Parameters          | Province |      |        |          |        | Total  |
|---------------------|----------|------|--------|----------|--------|--------|
|                     | Sefrou   | Fès  | Meknes | El Hajeb | Ifrane |        |
| Area (Ha)           |          |      |        |          |        |        |
| Vegetable gardening | 820      | 3460 | 7032   | 9127     | 1434   | 21,873 |
| Arboriculture       | 6670     | 3772 | 8498   | 15,331   | 462    | 35,733 |
| Percentage %        |          |      |        |          |        |        |
| Vegetable gardening | 4        | 16   | 32     | 42       | 7      | 100    |
| Arboriculture       | 19       | 11   | 24     | 43       | 4      | 100    |
| Factor              |          |      |        |          |        |        |
| Vegetable gardening | 1        | 4    | 8      | 10       | 2      | 25     |
| Arboriculture       | 5        | 3    | 6      | 10       | 1      | 25     |

**Table S2.** Knowledge and decision-making mechanism related to pesticide use practices.

| No | Question                                                                                                                    | n (%)       |
|----|-----------------------------------------------------------------------------------------------------------------------------|-------------|
| 1  | To initiate treatment, you rely on?<br>$\chi^2 = 361.1^{**}$                                                                |             |
|    | Harmfulness threshold                                                                                                       | 239 (45.2%) |
|    | The date fixed in advance                                                                                                   | 242 (46%)   |
|    | Regional surveillance                                                                                                       | 9 (1.7%)    |
|    | Neighbors                                                                                                                   | 37 (7%)     |
| 2  | What support is available for decision making in terms of choice of the <b>date</b> of treatment?<br>$\chi^2 = 357.1^{**}$  |             |
|    | Harmfulness threshold                                                                                                       | 21(4%)      |
|    | The date fixed in advance                                                                                                   | 258 (49%)   |
|    | Regional surveillance                                                                                                       | 220 (41.8%) |
|    | Neighbors                                                                                                                   | 27(5.1%)    |
| 3  | What support is available for decision making in terms of choice of the concentration of treatment<br>$\chi^2 = 673.1^{**}$ |             |
|    | Harmfulness threshold                                                                                                       | 2 (0.4%)    |
|    | The date fixed in advance                                                                                                   | 366 (69.6%) |
|    | Regional surveillance                                                                                                       | 154 (29.3%) |
|    | Neighbors                                                                                                                   | 4 (0.8%)    |
| 4  | What support is available for decision making in terms of choice of the active ingredient?<br>$\chi^2 = 683^{**}$           |             |
|    | Harmfulness threshold                                                                                                       | 4 (0.8%)    |
|    | The date fixed in advance                                                                                                   | 375 (71.3%) |
|    | Regional surveillance                                                                                                       | 135 (25.7%) |
|    | Neighbors                                                                                                                   | 12 (2.3%)   |
| 5  | If treatment is ineffective, will you rather tend?<br>$\chi^2 = 82.2^{**}$                                                  |             |
|    | increase the concentration or change the product.                                                                           | 159 (30.2%) |
|    | consult a specialist in phytosanitary products                                                                              | 367 (69.8%) |
| 6  | Where do you buy phytosanitary products?<br>$\chi^2 = 452.7^{**}$                                                           |             |
|    | retailer                                                                                                                    | 507 (96.4%) |
|    | company directly                                                                                                            | 19 (3.6%)   |
| 7  | Do you use other methods than chemical methods?<br>$\chi^2 = 655^{**}$                                                      |             |
|    | Never                                                                                                                       | 450 (85.6%) |
|    | Rare                                                                                                                        | 67 (12.7)   |
|    | Often                                                                                                                       | 9 (1.7)     |
| 8  | If so, what are these methods?<br>$\chi^2 = 1036^{**}$                                                                      |             |
|    | biological control                                                                                                          | 19 (25%)    |
|    | variety resistance                                                                                                          | 7 (9.2%)    |
|    | rotation                                                                                                                    | 50 (65.8%)  |

$^{**} p < 0.05$ .

**Table S3.** Behavior of farmers for storing and disposing of pesticides.

| No | Question                                                                                                              | n (%)       |
|----|-----------------------------------------------------------------------------------------------------------------------|-------------|
| 1  | Do you have a room fitted out for the storage of phytosanitary products?<br>$\chi^2 = 23.8^{**}$                      |             |
|    | Yes                                                                                                                   | 319 (60.6%) |
|    | No                                                                                                                    | 207 (39.4%) |
| 2  | Do you respect the recommended use of concentrations?<br>$\chi^2 = 385^{**}$                                          |             |
|    | Often                                                                                                                 | 57 (10.8%)  |
|    | Frequent                                                                                                              | 82 (15.6%)  |
|    | Always                                                                                                                | 387(73.6)   |
| 3  | Do you take into account the climate (rain, wind ...) to carry out a treatment?<br>$\chi^2 = 475^{**}$                |             |
|    | Yes                                                                                                                   | 513 (97.5%) |
|    | No                                                                                                                    | 13(2.5%)    |
| 4  | Do you take into account the time of day (morning, midday, evening) when performing treatment?<br>$\chi^2 = 338^{**}$ |             |
|    | Yes                                                                                                                   | 474 (90.1%) |
|    | No                                                                                                                    | 52 (9.9%)   |
| 5  | Who's in charge of treatment?<br>$\chi^2 = 596.8^{**}$                                                                |             |
|    | Myself                                                                                                                | 438 (83.3%) |
|    | qualified person                                                                                                      | 20 (3.8%)   |
|    | simple farm worker                                                                                                    | 68 (12.9%)  |
| 6  | What is the fate of the sprayer rinse water after its use?<br>$\chi^2 = 413^{**}$                                     |             |
|    | Application in the treated field.                                                                                     | 381 (72.4%) |
|    | Application on uncultivated land                                                                                      | 140 (26.6%) |
|    | Release into waterways                                                                                                | 5 (1%)      |
| 7  | What is the fate of chemical packaging?<br>Leave at the edge of the fields<br>$\chi^2 = 41.4^{**}$                    |             |
|    | Yes                                                                                                                   | 192 (36.5%) |
|    | No                                                                                                                    | 334(63.5%)  |
|    | Burial<br>$\chi^2 = 0.4$                                                                                              |             |
|    | Yes                                                                                                                   | 255(48.5%)  |
|    | No                                                                                                                    | 271 (51.5%) |
|    | Public landfills<br>$\chi^2 = 56.2^{**}$                                                                              |             |
|    | Yes                                                                                                                   | 177 (33.7%) |
|    | No                                                                                                                    | 349 (66.3%) |
|    | Streams<br>$\chi^2 = 212^{**}$                                                                                        |             |
|    | Yes                                                                                                                   | 96 (18.3%)  |
|    | No                                                                                                                    | 430 (81.7%) |
|    | Cremation<br>$\chi^2 = 5.5^{**}$                                                                                      |             |
|    | Yes                                                                                                                   | 236 (44.9%) |
|    | No                                                                                                                    | 290 (55.1%) |

\*\*  $p < 0.05$ .

**Table S4.** Precautionary measure of the farmers surveyed.

| No | Question                                                         | n (%)       |
|----|------------------------------------------------------------------|-------------|
| 1  | Use of waterproof gloves<br>$\chi^2 = 41.4^{**}$                 |             |
|    | Never                                                            | 205 (39%)   |
|    | Sometimes                                                        | 215 (40.9%) |
|    | Every use                                                        | 106 (20.2%) |
| 2  | Use of hat<br>$\chi^2 = 294.7^{**}$                              |             |
|    | Never                                                            | 348 (66.2%) |
|    | Sometimes                                                        | 148 (28.1%) |
|    | Every use                                                        | 30 (5.7%)   |
| 3  | Use of masks<br>$\chi^2 = 128.2^{**}$                            |             |
|    | Never                                                            | 255 (48.5%) |
|    | Sometimes                                                        | 216 (41.1%) |
|    | Every use                                                        | 55 (10.5%)  |
| 4  | Use of boots<br>$\chi^2 = 90.3^{**}$                             |             |
|    | Never                                                            | 80 (15.2%)  |
|    | Sometimes                                                        | 257 (48.9%) |
|    | Every use                                                        | 189 (35.9%) |
| 5  | Use of mask with filter cartridge<br>$\chi^2 = 998.7^{**}$       |             |
|    | Never                                                            | 517 (98.3%) |
|    | Sometimes                                                        | 2 (0.4%)    |
|    | Every use                                                        | 7 (1.3%)    |
| 6  | Use of goggles<br>$\chi^2 = 419.2^{**}$                          |             |
|    | Never                                                            | 385 (73.2%) |
|    | Sometimes                                                        | 132 (25.1%) |
|    | Every use                                                        | 9 (1.7%)    |
| 7  | Porridge preparation place<br>Orchard                            | 526 (100%)  |
| 8  | Consume food while spraying<br>$\chi^2 = 144.8^{**}$             |             |
|    | Yes                                                              | 125 (23.8%) |
|    | No                                                               | 401 (76.2%) |
| 9  | Consume drinks while spraying<br>$\chi^2 = 10.4^{**}$            |             |
|    | Yes                                                              | 300 (57%)   |
|    | No                                                               | 226 (40.7%) |
| 10 | What types of measures do you take after application pesticides? |             |
|    | Take a shower<br>$\chi^2 = 479$                                  |             |
|    | Yes                                                              | 514 (97.7%) |
|    | No                                                               | 12 (2.3%)   |
|    | Cleaning clothes<br>$\chi^2 = 93.6$                              |             |
|    | Yes                                                              | 374 (71.1%) |
|    | No                                                               | 152 (28.9%) |

\*\*  $p < 0.05$ .

**Table S5.** Awareness of the risks of pesticides on the environment and human health.

| No | Question                                                                                               | n (%)       |
|----|--------------------------------------------------------------------------------------------------------|-------------|
| 1  | Do you know the pesticide residues?<br>$\chi^2 = 301.1^{**}$                                           |             |
|    | Yes                                                                                                    | 64 (12.2%)  |
|    | No                                                                                                     | 462 (87.8%) |
| 2  | Do you think pesticides are harmful to human health?<br>$\chi^2 = 605.8^{**}$                          |             |
|    | Neutral                                                                                                | 126 (24%)   |
|    | Average for                                                                                            | 76 (14.4%)  |
|    | Agree                                                                                                  | 324 (61.6%) |
| 3  | Did you know that the environment can be affected by pesticides?<br>$\chi^2 = 227.5^{**}$              |             |
|    | Yes                                                                                                    | 436 (82.9%) |
|    | No                                                                                                     | 90 (17.1%)  |
| 4  | Do you think that water pollution is linked to the application of pesticides?<br>$\chi^2 = 196.2^{**}$ |             |
|    | Neutral                                                                                                | 67 (12.7%)  |
|    | Average for                                                                                            | 19 (3.6%)   |
|    | Agree                                                                                                  | 440 (83.7%) |
| 5  | Do you know the relationship between pesticides and disease?<br>$\chi^2 = 90.3^{**}$                   |             |
|    | Yes                                                                                                    | 372 (70.7%) |
|    | No                                                                                                     | 154 (29.3%) |

**\*\***  $p < 0.05$ .
